# Supplementary material for: Developmental pathways to adiposity begin before birth and are influenced by genotype, prenatal environment and epigenome
Source: PubMed Central journal article supplement (PMC5340003; doi:10.1186/s12916-017-0800-1), 2017-03-07
Supplement: 12916_2017_800_MOESM3_ESM.pdf [file 12916_2017_800_MOESM3_ESM.pdf]

**Developmental pathways to adiposity  
begin before birth and are influenced by  
genotype, prenatal environment and epigenome  
Information on methylation file**

- Compressed filename: GUSTO\_Infant\_450K\_987samples\_174211cpg.tar.gz  
(md5sum eaa9b17b9dd13f9bd594bdb406c6262d)
- To uncompress: “tar -zxvf GUSTO\_Infant\_450K\_987samples\_174211cpg.tar.gz”.
- Uncompressed filename: v11b\_data\_GUSTO\_450k\_987samples-meth-blinded.pheno  
(md5sum: 442cfd5b4fa2ac6c56e710da50021979)
- Tab-delimited file contains methylation values for 987 samples, 174,211 CpGs.
- Missing value is coded as -9.
- Each row is a CpG, each column is a sample, first column gives CpG name.
